# Supplementary material for: Viral proteins resolve the virus-vector conundrum during hemipteran-mediated transmission by subverting salicylic acid signaling pathway
Source: PubMed Central journal article supplement — Nat Commun. 2024 Nov 1;15:9448. doi: 10.1038/s41467-024-53894-y (PMC11530440; doi:10.1038/s41467-024-53894-y), 2024-11-01
Supplement: 41467_2024_53894_MOESM3_ESM.pdf [file 41467_2024_53894_MOESM3_ESM.pdf]

## Description of Additional Supplementary Files

**Supplementary Data 1:** Primers used in this study
