# Supplementary material for: Viral proteins resolve the virus-vector conundrum during hemipteran-mediated transmission by subverting salicylic acid signaling pathway
Source: PubMed Central journal article supplement — Nat Commun. 2024 Nov 1;15:9448. doi: 10.1038/s41467-024-53894-y (PMC11530440; doi:10.1038/s41467-024-53894-y), 2024-11-01
Supplement: 41467_2024_53894_MOESM4_ESM.pdf [file 41467_2024_53894_MOESM4_ESM.pdf]

**Supplementary Data 1 Primers used in this study.**

| Primer           | Sequence (5'-3')                                    | Application                              |
|------------------|-----------------------------------------------------|------------------------------------------|
| NtActin-RTF      | GTGTTAGCCACACTGTCCCA                                | NtActin quantity                         |
| NtActin-RTR      | TCAGTCAAGTCACGACCAGC                                | analysis in DNA                          |
| TbCSV-RTF        | GAAGCGTCCAGCAGATATAA                                | Quantification of                        |
| TbCSV-RTR        | GGGACATCAGGACTTCTGTA                                | TbCSV in DNA                             |
| NbDNA-Actin-RTF  | GCGAGTAAACCCGTAAGG                                  | NbActin quantity                         |
| NbDNA-Actin-RTR  | GCTCAGGCATAGTTCACC                                  | analysis in DNA                          |
| SIDNA-Actin-RTF  | TGGAGGATCCATCCTTGCATCAC                             | SIActin quantity                         |
| SIDNA-Actin-RTR  | TCGCCCTTTGAAATCCACATCTGC                            | analysis in DNA                          |
| ToLCCNV-RTF      | TCTGGATTGTCCGAGACAGG                                | Quantification of                        |
| ToLCCNV-RTR      | GTTGCCTGAAACCTGCGTAT                                | ToLCCNV in DNA                           |
| TbCSB-βC1-F      | ATGACAATTAATAACAACAA                                | TbCSB βC1 detection                      |
| TbCSB-βC1-R      | TACATTAGCTATTGTCC                                   | in cDNA                                  |
| ToLCCNB-βC1-F    | ATGACGATCCAATACACCAAT                               | ToLCCNB βC1                              |
| ToLCCNB-βC1-R    | TGTAGTTGCATTCTGTG                                   | detection in cDNA                        |
| NbcDNA-Actin-RTF | CAATCCAGACACTGTACTTTCTCTC                           | NbActin mRNA level                       |
| NbcDNA-Actin-RTR | AAGCTGCAGGTATCCATGAGACTA                            | analysis in cDNA                         |
| NbcDNA-PR1a-RTF  | CGTTGAGATGTGGGTTCGATG                               | NbPR1a mRNA level                        |
| NbcDNA-PR1a-RTR  | CCTAGCACATCCAACACGAA                                | analysis in cDNA                         |
| NbcDNA-PR2-RTF   | CATTAGCAGCAGCAGGGTTG                                | NbPR2 mRNA level                         |
| NbcDNA-PR2-RTR   | GAGTGGAAAGTTATGTCGTGC                               | analysis in cDNA                         |
| GST-TbbetaC1-F   | CGCGGATCCATGACAATTAATAACAACAA                       | Ligation of TbCSB                        |
| GST-TbbetaC1-R   | TCCCCCGGGTCATACATTAGCTATTGTCC                       | βC1 with pGEX-6p-1                       |
| YC-TbbetaC1-F    | CCCTTAATTAACATGACAATTAATAACAAC<br>AAC               | Ligation of TbCSB<br>βC1 with p2YC       |
| YC-TbbetaC1-R    | GGGACTAGTTACATTAGCTATTGTCCCTA                       |                                          |
| HSP90-12-YC-YN-F | ACCATTTACGAACGATAGTTAATTAACATG<br>GCACCAGCACTAAGCAG | Ligation of NbHSP90-<br>12 with p2YC and |
| HSP90-12-YC-YN-R | CCACCACTGCCACCTCCTCCACTAGTCTC<br>CCAAAGATCATTACTCT  | p2YN                                     |
| HSP90-2-YC-YN-F  | ACCATTTACGAACGATAGTTAATTAACATG<br>GCGGAGCAGGAGACGTT | Ligation of NbHSP90-<br>2 with p2YC and  |
| HSP90-2-YC-YN-R  | CCACCACTGCCACCTCCTCCACTAGTATC<br>AACTTCCTCCATCTTGC  | p2YN                                     |

|                  |                                                         |                                                  |
|------------------|---------------------------------------------------------|--------------------------------------------------|
| HSP90-2-ND-YN-F  | ACCATTTACGAACGATAGTTAATTAACATG<br>GCGGAGCAGGAGACGTT     | Ligation of <i>NbHSP90-2-ND</i> with p2YN        |
| HSP90-2-ND-YN-R  | CCACCACTGCCACCTCCTCCACTAGTATC<br>ATCAGAGATTTCTTTT       |                                                  |
| HSP90-2-MD-YN-F  | ACCATTTACGAACGATAGTTAATTAACATG<br>GAAAAGAAAAAGAAGAAGATC | Ligation of <i>NbHSP90-2-MD</i> with p2YN        |
| HSP90-2-MD-YN-R  | CCACCACTGCCACCTCCTCCACTAGTCCT<br>GAGAGCTTGTGCCTTCA      |                                                  |
| HSP90-2-CD-YN-F  | ACCATTTACGAACGATAGTTAATTAACATG<br>GACTCTAGCATGGCTGGATAC | Ligation of <i>NbHSP90-2-CD</i> with p2YN        |
| HSP90-2-CD-YN-R  | CCACCACTGCCACCTCCTCCACTAGTATC<br>AACTTCCTCCATCTTGC      |                                                  |
| HSP90-10-YC-YN-F | ACCATTTACGAACGATAGTTAATTAACATG<br>CACAGACTTTCGAAACG     | Ligation of <i>NbHSP90-10</i> with p2YC and p2YN |
| HSP90-10-YC-YN-R | CCACCACTGCCACCTCCTCCACTAGTTTTC<br>TGTCCACCAGCTTCAG      |                                                  |
| HSP90-10-ND-YN-F | ACCATTTACGAACGATAGTTAATTAACATG<br>CACAGACTTTCGAAACG     | Ligation of <i>NbHSP90-10-ND</i> with p2YN       |
| HSP90-10-ND-YN-R | CCACCACTGCCACCTCCTCCACTAGTATC<br>AACTTCAACCTCTTTTG      |                                                  |
| HSP90-10-MD-YN-F | ACCATTTACGAACGATAGTTAATTAACATG<br>AAGAAGAAGACCAAAAAAAT  | Ligation of <i>NbHSP90-10-MD</i> with p2YN       |
| HSP90-10-MD-YN-R | CCACCACTGCCACCTCCTCCACTAGTACC<br>AACAGTTTGGGCCTTCA      |                                                  |
| HSP90-10-CD-YN-F | ACCATTTACGAACGATAGTTAATTAACATG<br>GATACCTCCAACCTGGATTT  | Ligation of <i>NbHSP90-10-CD</i> with p2YN       |
| HSP90-10-CD-YN-R | CCACCACTGCCACCTCCTCCACTAGTTTTC<br>TGTCCACCAGCTTCAG      |                                                  |
| BK-TbbetaC1-F    | CTAGCCATGGAGATGACAATTAATAACAA<br>CAA                    | Ligation of TbCSB $\beta C1$ with pGBKT7         |
| BK-TbbetaC1-R    | CGCGGATCCTCATACATTAGCTATTGTCCC                          |                                                  |
| AD-HSP90-2-F     | GGGTGGGCATCGATACGGGATCCATATGG<br>CGGAGCAGGAGACGTT       | Ligation of <i>NbHSP90-2</i> with pGADT7         |
| AD-HSP90-2-R     | TGCAGCTCGAGCTCGATGGATCCTTAATC<br>AACTTCCTCCATCTT        |                                                  |
| AD-HSP90-10-F    | GGGTGGGCATCGATACGGGATCCATATGC<br>ACAGACTTTCGAAACG       | Ligation of <i>NbHSP90-10</i> with pGADT7        |

|                     |                                             |                                          |
|---------------------|---------------------------------------------|------------------------------------------|
| AD-HSP90-10-R       | TGCAGCTCGAGCTCGATGGATCCTTATTTCTGTCCACCAGCTT |                                          |
| HSP90-2-HAF         | CCGCTCGAGATGGCGGAGCAGGAGACGTT               | Ligation of <i>NbHSP90-2</i> with        |
| HSP90-2-HAR         | CTAGTCTAGAATCAACTTCCTCCATCTTGC              | pCAMBIA1300-3xHA                         |
| HSP90-10-HAF        | CCGCTCGAGATGCACAGACTTTTCGAAACG              | Ligation of <i>NbHSP90-10</i> with       |
| HSP90-10-HAR        | CTAGTCTAGATTTCTGTCCACCAGCTTCAG              | pCAMBIA1300-3xHA                         |
| HSP90-2-TRV-1F      | CTAGTCTAGAATGGCGGAGCAGGAGACGTT              | Ligation of <i>NbHSP90-2</i> with pTRV2  |
| HSP90-2-TRV-1R      | CGCGGATCCATTGCCCAATCATGCTAACAT              |                                          |
| HSP90-2-TRV-2F      | CTAGTCTAGAAACAAGGATGAAAGAAGGCC              | Ligation of <i>NbHSP90-2</i> with pTRV2  |
| HSP90-2-TRV-2R      | CGCGGATCCAACAGCAAGGAGAATCCACA               |                                          |
| NbcDNA-HSP90-2-RTF  | GATGAGGATTGCGGAGATGC                        | <i>NbHSP90-2</i> mRNA level analysis in  |
| NbcDNA-HSP90-2-RTR  | CCTCAGCATCAGCTTCAGGA                        | cDNA                                     |
| HSP90-10-TRV-1F     | CTAGTCTAGATCCTTGTTTCTGAACAAGTT              | Ligation of <i>NbHSP90-10</i> with pTRV2 |
| HSP90-10-TRV-1R     | CGGGGTACCCAGCTGTCTCATCTTCTCCT               |                                          |
| HSP90-10-TRV-2F     | CTAGTCTAGAGCGTCGTTTCGCATCATGAA              | Ligation of <i>NbHSP90-10</i> with pTRV2 |
| HSP90-10-TRV-2R     | CGGGGTACCAAGAAGTTTTTCAAGGAAAG               |                                          |
| NbcDNA-HSP90-10-RTF | CGAAACGCTCTGTCACTTCA                        | <i>NbHSP90-10</i> mRNA level analysis in |
| NbcDNA-HSP90-10-RTR | ATTGGAGCAGCAACATCTCG                        | cDNA                                     |
| HSP90-12-TRV-1F     | CTAGTCTAGACCTTCTTTACTTGGGGATGA              | Ligation of <i>NbHSP90-12</i> with pTRV2 |
| HSP90-12-TRV-1R     | CGGGGTACCGCTACTATCAGCCTCAGACT               |                                          |
| NbcDNA-HSP90-12-RTF | GGAGTGGTAGTGCCAATAGGT                       | <i>NbHSP90-12</i> mRNA level analysis in |
| NbcDNA-HSP90-12-RTR | GCCTCACACCTTACCACTAC                        | cDNA                                     |
| NbNPR3-HAF          | CGCGGATCCATGGATAATAGTAGGACTGC               | Ligation of <i>NbNPR3</i>                |

|                   |                                               |                                            |
|-------------------|-----------------------------------------------|--------------------------------------------|
| NbNPR3-HAR        | TCCCCCGGGTTTCCTAAAAGGGAGCTTAT                 | with pCAMBIA1300-3xHA                      |
| NbNPR3-TRV-F      | CTAGTCTAGACTGTAGCGTTCCTTGCTGAG                | Ligation of <i>NbNPR3</i> with pTRV2       |
| NbNPR3-TRV-R      | CGGGGTACCCATTGCTTTCAGGCCCTTGT                 |                                            |
| NbcDNA-NPR3-RTF   | ACATCAGCGGAAGCAGTAG                           | <i>NbNPR3</i> mRNA level analysis in cDNA  |
| NbcDNA-NPR3-RTR   | GTCGGCGAAGTAGTCAAAC                           |                                            |
| BK-NPR3-F         | CTAGCCATGGAGATGGATAATAGTAGGACTGC              | Ligation of <i>NbNPR3</i> with pGBKT7      |
| BK-NPR3-R         | CGCGGATCCCTATTTTCCTAAAAGGGAGCTT               |                                            |
| AD-NPR3-F         | GGGTGGGCATCGATACGGGATCCATATGGATAATAGTAGGACTGC | Ligation of <i>NbNPR3</i> with pGADT7      |
| AD-NPR3-R         | TGCAGCTCGAGCTCGATGGATCCCTATTTCTAAAAGGGAGCTT   |                                            |
| CMV-2b-F          | ATGGAATTGAACGTAGGTGC                          | CMV <i>2b</i> detection in cDNA            |
| CMV-2b-R          | GAAAGCACCTTCCGCCC                             |                                            |
| TuMV-HC-Pro-F     | ATGAGTGCAGCAGGAGCCAA                          | TuMV <i>HC-Pro</i> detection in cDNA       |
| TuMV-HC-Pro-R     | TCCAACGCGGTAGTGTT                             |                                            |
| BK-CMV-2b-F       | CTAGCCATGGAGATGGAATTGAACGTAGGTGC              | Ligation of CMV <i>2b</i> with pGBKT7      |
| BK-CMV-2b-R       | CGCGGATCCTCAGAAAGCACCTTCCGCCC                 |                                            |
| BK- TuMV-HC-Pro-F | CTAGCCATGGAGATGAGTGCAGCAGGAGCA                | Ligation of TuMV <i>HC-Pro</i> with pGBKT7 |
| BK- TuMV-HC-Pro-R | CGCGGATCCTCATCCAACGCGGTAGTGTT                 |                                            |

---
